# Supplementary material for: Uncovering the prognostic gene signatures for the improvement of risk stratification in cancers by using deep learning algorithm coupled with wavelet transform
Source: Springer Nature journal article supplement (doi:10.1186/s12859-020-03544-z), 2020-05-19
Supplement: MOESM3 [file 12859_2020_3544_MOESM3_ESM.pdf]

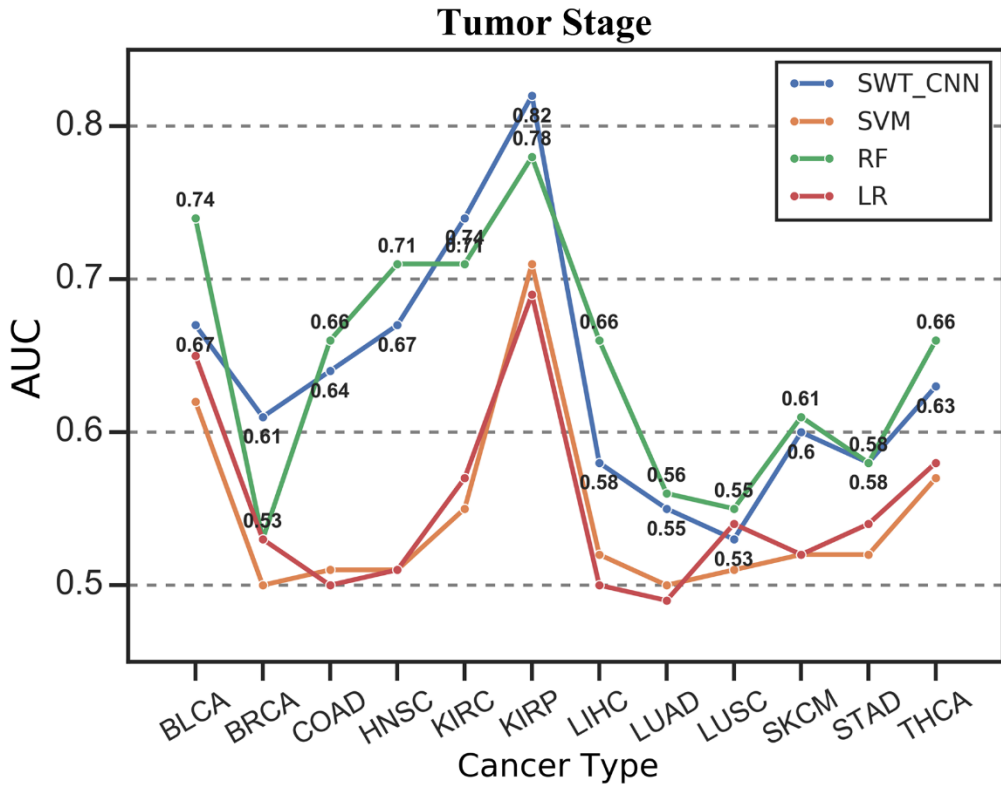

Figure 1. The performance of SWT-CNN, SVM, random forest and logistic regression on predicting the tumor stages of all cancer types.

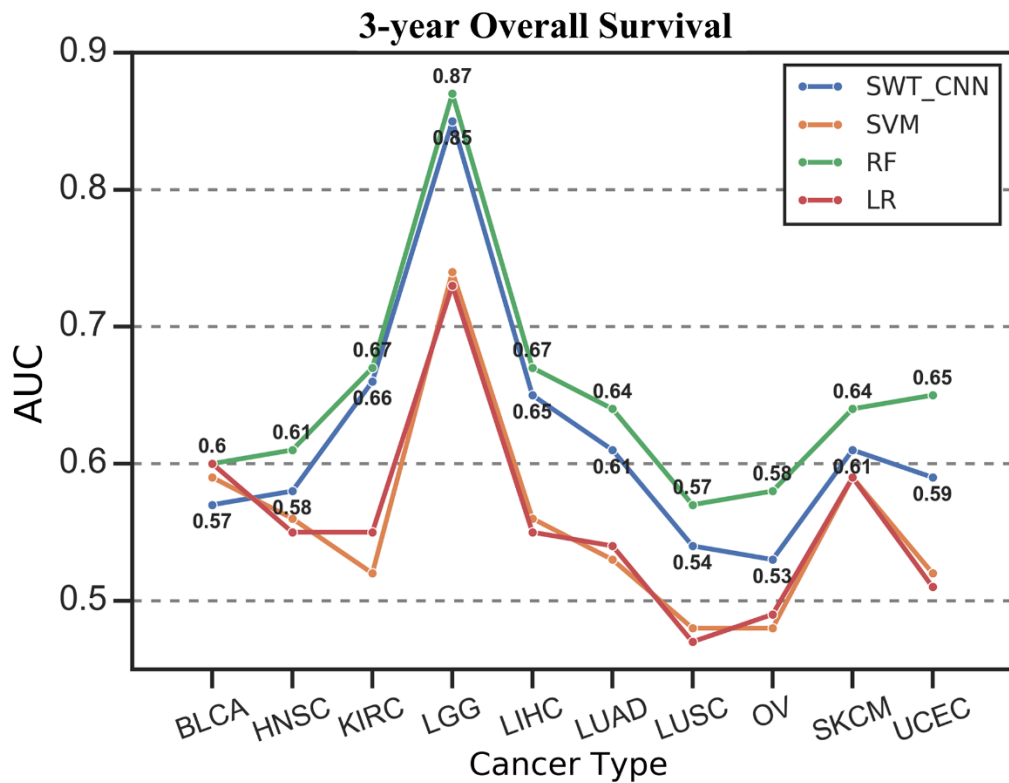

Figure 2. The performance of SWT-CNN, SVM, random forest and logistic regression on predicting the 3-year overall survivals of all cancer types.
