# Supplementary material for: Uncovering the prognostic gene signatures for the improvement of risk stratification in cancers by using deep learning algorithm coupled with wavelet transform
Source: Springer Nature journal article supplement (doi:10.1186/s12859-020-03544-z), 2020-05-19
Supplement: MOESM4 [file 12859_2020_3544_MOESM4_ESM.pdf]

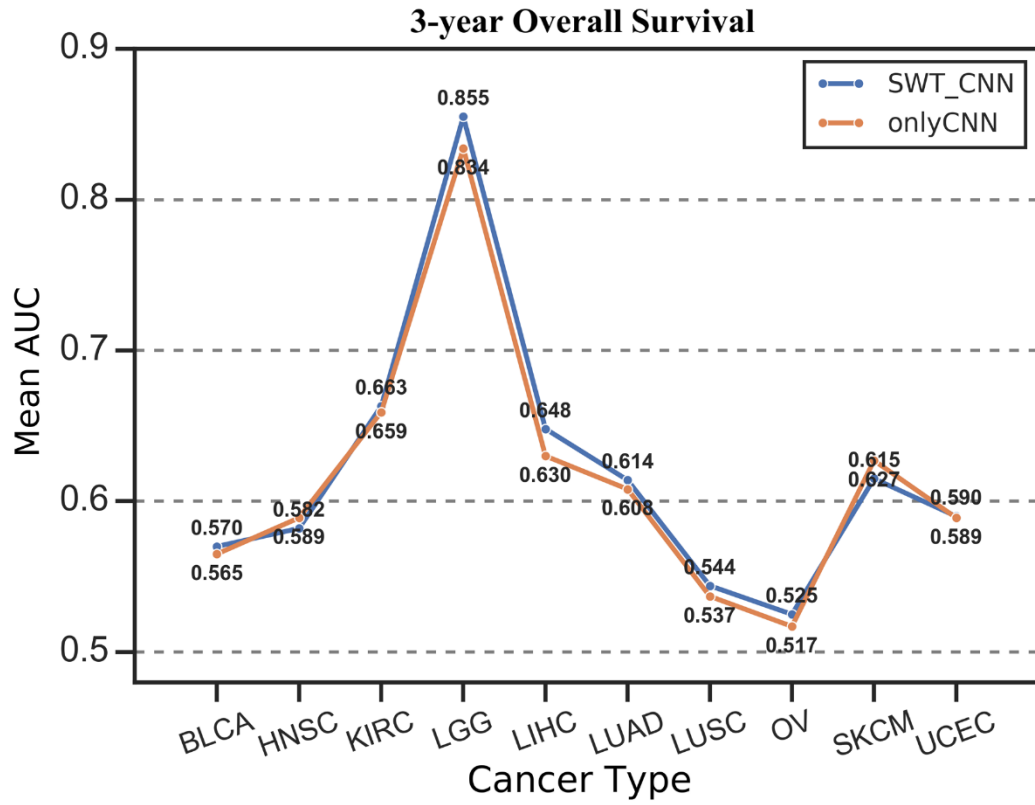

Figure 1. The performance of CNN algorithm with and without SWT on predicting 3-year overall survival of all the cancer types.
