# Supplementary material for: Uncovering the prognostic gene signatures for the improvement of risk stratification in cancers by using deep learning algorithm coupled with wavelet transform
Source: Springer Nature journal article supplement (doi:10.1186/s12859-020-03544-z), 2020-05-19
Supplement: MOESM6 [file 12859_2020_3544_MOESM6_ESM.pdf]

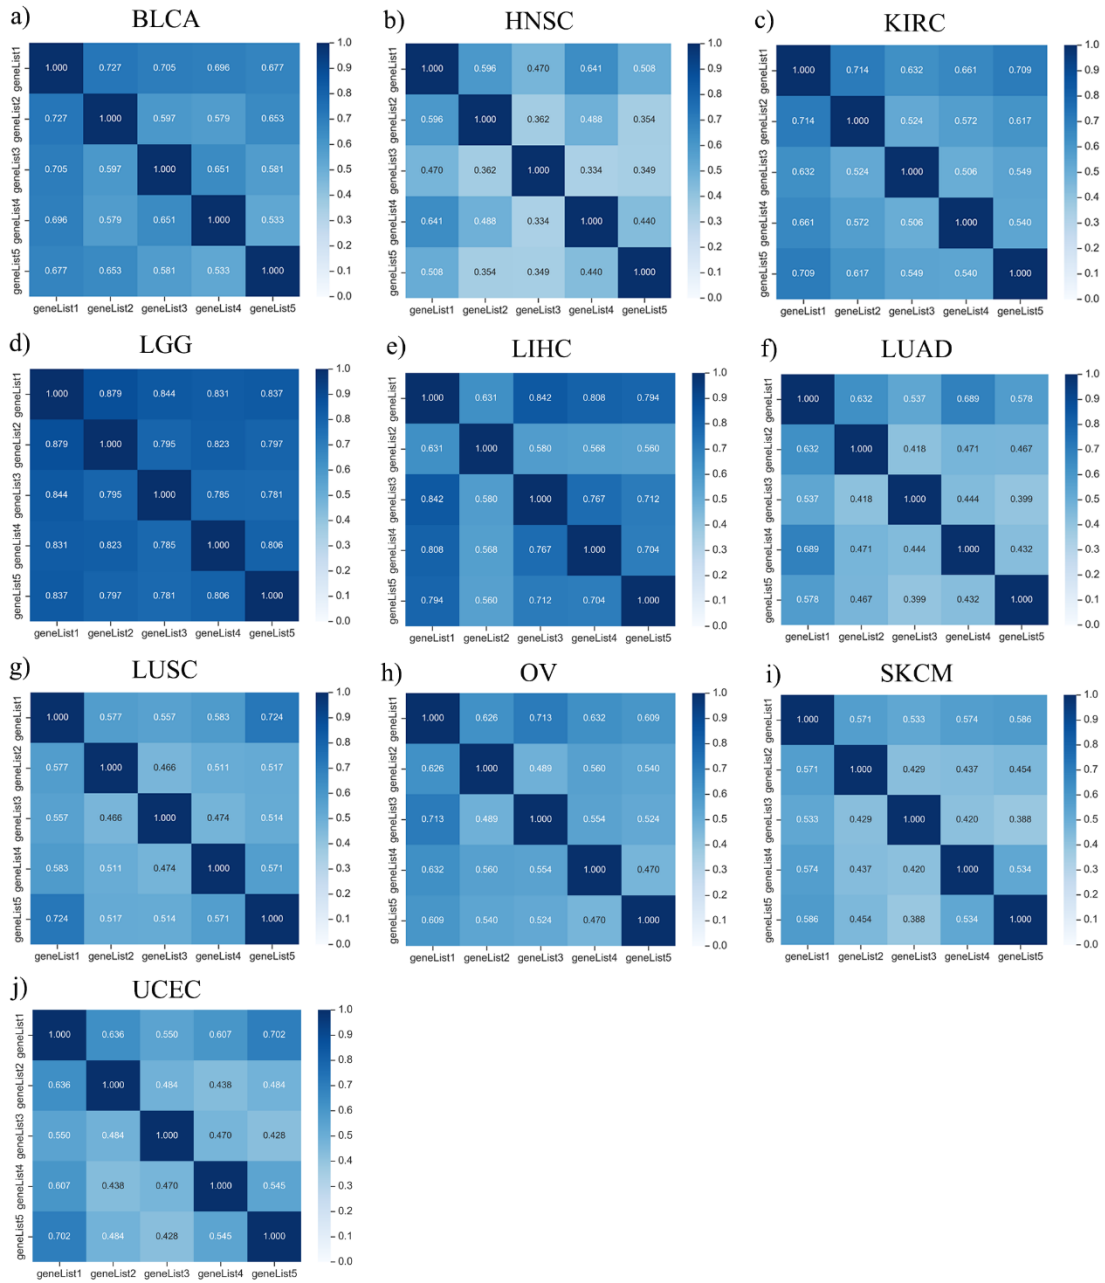

Figure 1. Kendall-Tau values of gene lists generated from the 5 bootstrap for 10 TCGA datasets
