# Supplementary material for: Uncovering the prognostic gene signatures for the improvement of risk stratification in cancers by using deep learning algorithm coupled with wavelet transform
Source: BMC Bioinformatics. 2020 May 19;21:195. doi: 10.1186/s12859-020-03544-z (PMC7236453; doi:10.1186/s12859-020-03544-z)
Supplement: Supplementary file 1 — Additional file 1. The mean AUCs and standard errors of AUCs on predicting the tumor stages and 3-year overall survivals. [file 12859_2020_3544_MOESM1_ESM.xlsx]

## Sheet: tumor stage
cancer type	SWT-CNN		SVM		p-value
	meanAUC	stdAUC	meanAUC	stdAUC
BLCA	0.67	0.038103	0.62	0.060699	<0.0001
BRCA	0.61	0.031432	0.5	0.020006	<0.0001
COAD	0.64	0.040031	0.51	0.040849	<0.0001
HNSC	0.67	0.046423	0.51	0.031728	<0.0001
KIRC	0.74	0.033259	0.55	0.040069	<0.0001
KIRP	0.82	0.047689	0.71	0.078727	<0.0001
LIHC	0.58	0.052233	0.52	0.036472	<0.0001
LUAD	0.55	0.042164	0.5	0.042208	<0.0001
LUSC	0.53	0.061357	0.51	0.032607	0.0171027
SKCM	0.6	0.03904	0.52	0.031213	<0.0001
STAD	0.58	0.05071	0.52	0.041771	<0.0001
THCA	0.63	0.04292	0.57	0.038519	<0.0001

## Sheet: 3-year overall survival
cancer type	SWT-CNN		SVM		p-value
	meanAUC	stdAUC	meanAUC	stdAUC
BLCA	0.57	0.053257	0.59	0.049103	0.0272754
HNSC	0.58	0.049647	0.56	0.050411	0.00053492
KIRC	0.66	0.051556	0.52	0.032091	<0.0001
LGG	0.85	0.050588	0.74	0.061725	<0.0001
LIHC	0.65	0.057979	0.56	0.058926	<0.0001
LUAD	0.61	0.051514	0.53	0.044643	<0.0001
LUSC	0.54	0.048015	0.48	0.043322	<0.0001
OV	0.53	0.054883	0.48	0.045371	<0.0001
SKCM	0.61	0.043712	0.59	0.04665	0.00046983
UCEC	0.59	0.052275	0.52	0.049168	<0.0001
